# Supplementary material for: Gender equity and COVID-19 vaccine policies for pregnant people: a global analysis
Source: Springer Nature journal article supplement (doi:10.1186/s12939-025-02497-0), 2025-05-07
Supplement: MOESM1 [file 12939_2025_2497_MOESM1_ESM.pdf]

# **Supplementary Material: Gender equity and COVID-19 vaccine policies for pregnant people: A global analysis.**

## Table of Contents

|                                                                                                                                                                |          |
|----------------------------------------------------------------------------------------------------------------------------------------------------------------|----------|
| <b>Supplementary Table 1. Distribution of GGGI scores by policy position on the use of COVID-19 vaccines in pregnancy at three timepoints. ....</b>            | <b>2</b> |
| <b>Supplementary Table 2. Odds of a restrictive policy position by GGGI score at three time points, unadjusted and adjusted, with outlier removed.....</b>     | <b>3</b> |
| <b>Supplementary Table 3. Frequency of country income level by policy position on the use of COVID-19 vaccines in pregnancy at three timepoints. ....</b>      | <b>4</b> |
| <b>Supplementary Table 4. Frequency of mRNA vaccine availability by policy position on the use of COVID-19 vaccines in pregnancy at three timepoints. ....</b> | <b>5</b> |

**Supplementary Table 1. Distribution of GGI scores by policy position on the use of COVID-19 vaccines in pregnancy at three timepoints.**

|            | GGI Score  |      |       |              |             |      |       |              |
|------------|------------|------|-------|--------------|-------------|------|-------|--------------|
|            | Permissive |      |       |              | Restrictive |      |       |              |
| Timepoint  | n          | mean | SD    | (95% CI)     | n           | mean | SD    | (95% CI)     |
| 6/1/2021   | 66         | 0.73 | 0.067 | (0.71, 0.74) | 49          | 0.70 | 0.065 | (0.68, 0.71) |
| 10/15/2021 | 120        | 0.72 | 0.061 | (0.71, 0.73) | 17          | 0.66 | 0.071 | (0.62, 0.69) |
| 3/1/2022   | 134        | 0.72 | 0.060 | (0.71, 0.73) | 8           | 0.63 | 0.090 | (0.57, 0.70) |

**Supplementary Table 2. Odds of a restrictive policy position by GGGI score at three time points, unadjusted and adjusted, with outlier removed.**

|      | <b>6/1/2021</b> |                  |            |       | <b>10/15/2021</b> |      |            |       | <b>3/1/2022</b> |      |            |       |
|------|-----------------|------------------|------------|-------|-------------------|------|------------|-------|-----------------|------|------------|-------|
|      | n               | cOR              | 95%CI      | p-val | n                 | cOR  | 95%CI      | p-val | n               | cOR  | 95%CI      | p-val |
| GGGI | 113             | 0.93             | 0.87, 0.99 | 0.023 | 136               | 0.88 | 0.80, 0.96 | 0.006 | 141             | 0.86 | 0.75, 0.98 | 0.021 |
|      | n               | aOR <sup>1</sup> | 95%CI      | p-val | n                 | aOR  | 95%CI      | p-val | n               | aOR  | 95%CI      | p-val |
| GGGI | 113             | 0.97             | 0.90, 1.04 | 0.353 | 136               | 0.91 | 0.82, 1.00 | 0.066 | 141             | 0.87 | 0.76, 0.99 | 0.047 |

<sup>1</sup> Multiple logistic regression adjusted for country income level and mRNA vaccine availability.

cOR: crude odds ratio; aOR: adjusted odds ratio; GGGI: Global Gender Gap Index

**Supplementary Table 3. Frequency of country income level by policy position on the use of COVID-19 vaccines in pregnancy at three timepoints.**

|              | 6/1/2021   |      |             |      | 10/15/2021 |      |             |      | 3/1/2022   |      |             |      |
|--------------|------------|------|-------------|------|------------|------|-------------|------|------------|------|-------------|------|
|              | Permissive |      | Restrictive |      | Permissive |      | Restrictive |      | Permissive |      | Restrictive |      |
| Income level | n          | %    | n           | %    | n          | %    | n           | %    | n          | %    | n           | %    |
| Low          | 2          | 50.0 | 2           | 50.0 | 6          | 54.5 | 5           | 45.5 | 13         | 81.3 | 3           | 18.8 |
| Low middle   | 9          | 34.6 | 17          | 65.4 | 29         | 76.3 | 9           | 23.7 | 37         | 90.2 | 4           | 9.8  |
| Upper middle | 18         | 45.0 | 22          | 55.0 | 45         | 86.5 | 7           | 13.5 | 50         | 94.3 | 3           | 5.7  |
| High         | 56         | 73.7 | 20          | 26.3 | 83         | 95.4 | 4           | 4.6  | 85         | 96.6 | 3           | 3.4  |

**Supplementary Table 4. Frequency of mRNA vaccine availability by policy position on the use of COVID-19 vaccines in pregnancy at three timepoints.**

|                           | 6/1/2021   |      |             |      | 10/15/2021 |      |             |      | 3/1/2022   |      |             |     |
|---------------------------|------------|------|-------------|------|------------|------|-------------|------|------------|------|-------------|-----|
|                           | Permissive |      | Restrictive |      | Permissive |      | Restrictive |      | Permissive |      | Restrictive |     |
| mRNA vaccine availability | n          | %    | n           | %    | n          | %    | n           | %    | n          | %    | n           | %   |
| Available                 | 62         | 68.1 | 29          | 31.9 | 120        | 91.6 | 11          | 8.4  | 137        | 93.8 | 9           | 6.2 |
| Unavailable               | 23         | 41.8 | 32          | 58.2 | 43         | 75.4 | 14          | 24.6 | 48         | 92.3 | 4           | 7.7 |
